# Supplementary material
Source: publisher figshare collection journal article supplement (https://tandf.figshare.com/articles/dataset/_/1568569)
Supplement: Supplementary file 2 [file 2]

**Supplemental Material (Tables) for the paper:**

**Linear and non-linear modelling of the cytotoxicity of TiO<sub>2</sub> and ZnO nanoparticles by empirical descriptors**

by Ester Papa\*, Jean Pierre Doucet, and Annick Doucet-Panaye

Table S1. In this table are listed: ID numbers, names, values of the experimental descriptors and of the experimental response (LDH), classes of activities (Class 1=active, Class 2 = not active), and predictions calculated by equations 1-3 (MLR models) and by the J48 classification tree for the 42 studied NPs.

| ID | Name     | Engineered Size (X0) | Size in Water (X1) | Size in PBS (X2) | Concentration (X4) | Zeta Potential (X5) | LDH response | Activity Classes | Pred. (Eq.1) | Pred. (Eq.2) | Pred. (Eq.3) | Pred. (J48 Class.Tree) |
|----|----------|----------------------|--------------------|------------------|--------------------|---------------------|--------------|------------------|--------------|--------------|--------------|------------------------|
| 1  | TiO2 30  | 30                   | 125                | 1250             | 25                 | -10                 | 0.9          | 2                | 0.81         | 0.78         | -            | 2                      |
| 2  | TiO2 30  | 30                   | 102                | 987              | 25                 | -12                 | 1            | 2                | 0.82         | 0.78         | -            | 2                      |
| 3  | TiO2 30  | 30                   | 281                | 1543             | 50                 | -15                 | 0.75         | 2 (p)            | 0.86         | 0.85         | -            | 2                      |
| 4  | TiO2 30  | 30                   | 101                | 1045             | 50                 | -9                  | 0.7          | 2                | 0.88         | 0.85         | -            | 2                      |
| 5  | TiO2 30  | 30                   | 299                | 1754             | 100                | -11                 | 1.04         | 2                | 0.98         | 0.99         | -            | 1                      |
| 6  | TiO2 30  | 30                   | 134                | 961              | 100                | -11                 | 1.09         | 2 (p)            | 1.02         | 0.99         | -            | 1                      |
| 7  | TiO2 30  | 30                   | 600                | 1876             | 200                | -12                 | 1.15         | 1                | 1.24         | 1.26         | -            | 1                      |
| 8  | TiO2 30  | 30                   | 298                | 1165             | 200                | -12                 | 1.2          | 1                | 1.28         | 1.26         | -            | 1                      |
| 9  | TiO2 45  | 45                   | 129                | 2567             | 25                 | -9                  | 0.9          | 2 (p)            | 0.82         | 0.84         | -            | 2                      |
| 10 | TiO2 45  | 45                   | 129                | 2309             | 25                 | -10                 | 0.85         | 2                | 0.83         | 0.84         | -            | 2                      |
| 11 | TiO2 45  | 45                   | 201                | 2431             | 50                 | -9                  | 0.75         | 2                | 0.89         | 0.91         | -            | 2                      |
| 12 | TiO2 45  | 45                   | 201                | 2987             | 50                 | -11                 | 0.78         | 2 (p)            | 0.86         | 0.91         | -            | 2                      |
| 13 | TiO2 45  | 45                   | 451                | 2941             | 100                | -11                 | 1.4          | 1                | -            | -            | -            | 1                      |
| 14 | TiO2 45  | 45                   | 451                | 1934             | 100                | -9                  | 1.5          | 1                | -            | -            | -            | 1                      |
| 15 | TiO2 45  | 45                   | 876                | 1965             | 200                | -11                 | 1.35         | 1 (p)            | 1.31         | 1.31         | -            | 1                      |
| 16 | TiO2 45  | 45                   | 876                | 2109             | 200                | -10                 | 1.4          | 1                | 1.30         | 1.31         | -            | 1                      |
| 17 | TiO2 125 | 125                  | 136                | 3215             | 25                 | -11                 | 1.25         | 1                | 1.15         | 1.15         | -            | 1                      |
| 18 | TiO2 125 | 125                  | 136                | 2667             | 25                 | -10                 | 1.17         | 1 (p)            | 1.17         | 1.15         | -            | 1                      |
| 19 | TiO2 125 | 125                  | 149                | 3782             | 50                 | -10                 | 1            | 2                | 1.19         | 1.22         | -            | 2                      |
| 20 | TiO2 125 | 125                  | 149                | 2144             | 50                 | -15                 | 1.1          | 1                | 1.26         | 1.22         | -            | 2                      |
| 21 | TiO2 125 | 125                  | 343                | 3871             | 100                | -12                 | 1.5          | 1 (p)            | 1.32         | 1.35         | -            | 1                      |
| 22 | TiO2 125 | 125                  | 343                | 2890             | 100                | -9                  | 1.42         | 1                | 1.36         | 1.35         | -            | 1                      |
| 23 | TiO2 125 | 125                  | 967                | 3813             | 200                | -9                  | 1.6          | 1                | 1.59         | 1.62         | -            | 1                      |
| 24 | TiO2 125 | 125                  | 967                | 2671             | 200                | -8                  | 1.65         | 1 (p)            | 1.64         | 1.62         | -            | 1                      |
| 25 | ZnO 50   | 50                   | 55                 | 158              | 25                 | -55                 | 1.1          | 1                | 0.95         | -            | 1.05         | 2                      |
| 26 | ZnO 60   | 60                   | 68                 | 208              | 25                 | -45                 | 1.03         | 2                | 0.99         | -            | 1.03         | 2                      |

|                                                                                                                           |          |      |      |      |     |     |      |       |      |   |      |   |
|---------------------------------------------------------------------------------------------------------------------------|----------|------|------|------|-----|-----|------|-------|------|---|------|---|
| 27                                                                                                                        | ZnO 70   | 70   | 71   | 198  | 25  | -50 | 1.08 | 2 (p) | 1.03 | - | 1.04 | 2 |
| 28                                                                                                                        | ZnO 50   | 50   | 56   | 258  | 50  | -50 | 1    | 2     | 1.01 | - | 1.03 | 2 |
| 29                                                                                                                        | ZnO 60   | 60   | 78   | 386  | 50  | -50 | 0.92 | 2     | 1.05 | - | 0.98 | 2 |
| 30                                                                                                                        | ZnO 70   | 70   | 95   | 279  | 50  | -50 | 0.99 | 2 (p) | 1.10 | - | 1.06 | 2 |
| 31                                                                                                                        | ZnO 50   | 50   | 168  | 314  | 100 | -25 | 1.12 | 1     | 1.14 | - | 1.18 | 1 |
| 32                                                                                                                        | ZnO 60   | 60   | 151  | 385  | 100 | -30 | 1.25 | 1     | 1.18 | - | 1.13 | 1 |
| 33                                                                                                                        | ZnO 70   | 70   | 172  | 354  | 100 | -29 | 1.19 | 1 (p) | 1.23 | - | 1.17 | 1 |
| 34                                                                                                                        | ZnO 1000 | 1000 | 1245 | 1319 | 25  | -44 | 1.58 | 1     | -    | - | 1.63 | 1 |
| 35                                                                                                                        | ZnO 1200 | 1200 | 1268 | 1325 | 25  | -33 | 1.69 | 1     | -    | - | 1.65 | 1 |
| 36                                                                                                                        | ZnO 1500 | 1500 | 1198 | 1381 | 25  | -25 | 1.59 | 1 (p) | -    | - | 1.55 | 1 |
| 37                                                                                                                        | ZnO 1000 | 1000 | 1268 | 1459 | 50  | -30 | 0.92 | 2     | -    | - | -    | 2 |
| 38                                                                                                                        | ZnO 1200 | 1200 | 1301 | 1587 | 50  | -32 | 0.95 | 2     | -    | - | -    | 2 |
| 39                                                                                                                        | ZnO 1500 | 1500 | 1283 | 1523 | 50  | -29 | 0.84 | 2 (p) | -    | - | -    | 2 |
| 40                                                                                                                        | ZnO 1000 | 1000 | 1243 | 1925 | 100 | -20 | 1.25 | 1     | -    | - | 1.41 | 1 |
| 41                                                                                                                        | ZnO 1200 | 1200 | 1124 | 1805 | 100 | -21 | 1.39 | 1     | -    | - | 1.36 | 1 |
| 42                                                                                                                        | ZnO 1500 | 1500 | 1269 | 2109 | 100 | -21 | 1.45 | 1 (p) | -    | - | 1.34 | 1 |
| * 1 = Active (Disrupted membrane, LDH>1.09); 2 = Inactive (Not Disrupted membrane, LDH < 1.09)<br>** (p) = prediction set |          |      |      |      |     |     |      |       |      |   |      |   |

Table S2 TiO<sub>2</sub>+ZnO dataset: values of the descriptors, response and splitting

| ID Tot | X0  | X1  | X2   | X4  | X5  | LDH  | Rand1 | Rand2 | Rand3 | Rand4 | Rand5 | Rand6 | Rand7 | Rand8 | Rand9 | Rand10 | Rand 11 |
|--------|-----|-----|------|-----|-----|------|-------|-------|-------|-------|-------|-------|-------|-------|-------|--------|---------|
| 1      | 30  | 125 | 1250 | 25  | -10 | 0.9  | 1     | 2     | 1     | 2     | 1     | 1     | 1     | 1     | 1     | 1      | 1       |
| 2      | 30  | 102 | 987  | 25  | -12 | 1    | 1     | 1     | 1     | 1     | 2     | 1     | 1     | 1     | 1     | 1      | 2       |
| 3      | 30  | 281 | 1543 | 50  | -15 | 0.75 | 1     | 1     | 1     | 1     | 1     | 2     | 1     | 1     | 1     | 1      | 1       |
| 4      | 30  | 101 | 1045 | 50  | -9  | 0.7  | 1     | 1     | 2     | 1     | 1     | 1     | 1     | 1     | 1     | 1      | 2       |
| 5      | 30  | 299 | 1754 | 100 | -11 | 1.04 | 2     | 1     | 1     | 2     | 1     | 1     | 1     | 1     | 1     | 1      | 1       |
| 6      | 30  | 134 | 961  | 100 | -11 | 1.09 | 1     | 2     | 1     | 1     | 2     | 1     | 1     | 1     | 1     | 1      | 2       |
| 7      | 30  | 600 | 1876 | 200 | -12 | 1.15 | 1     | 1     | 1     | 1     | 1     | 2     | 1     | 1     | 1     | 1      | 1       |
| 8      | 30  | 298 | 1165 | 200 | -12 | 1.2  | 1     | 1     | 2     | 1     | 1     | 1     | 2     | 1     | 1     | 1      | 2       |
| 9      | 45  | 129 | 2567 | 25  | -9  | 0.9  | 1     | 1     | 1     | 2     | 1     | 1     | 1     | 1     | 1     | 2      | 1       |
| 10     | 45  | 129 | 2309 | 25  | -10 | 0.85 | 2     | 1     | 1     | 1     | 2     | 1     | 1     | 1     | 2     | 1      | 2       |
| 11     | 45  | 201 | 2431 | 50  | -9  | 0.75 | 1     | 2     | 1     | 1     | 1     | 2     | 1     | 2     | 1     | 1      | 1       |
| 12     | 45  | 201 | 2987 | 50  | -11 | 0.78 | 1     | 1     | 2     | 1     | 1     | 1     | 2     | 1     | 1     | 1      | 2       |
| 15     | 45  | 876 | 1965 | 200 | -11 | 1.35 | 1     | 1     | 1     | 2     | 1     | 1     | 1     | 1     | 1     | 2      | 1       |
| 16     | 45  | 876 | 2109 | 200 | -10 | 1.4  | 1     | 1     | 1     | 1     | 2     | 1     | 1     | 1     | 2     | 1      | 2       |
| 17     | 125 | 136 | 3215 | 25  | -11 | 1.25 | 2     | 1     | 1     | 1     | 1     | 2     | 1     | 2     | 1     | 1      | 1       |
| 18     | 125 | 136 | 2667 | 25  | -10 | 1.17 | 1     | 2     | 2     | 1     | 1     | 1     | 2     | 1     | 1     | 1      | 2       |
| 19     | 125 | 149 | 3782 | 50  | -10 | 1    | 1     | 1     | 1     | 2     | 1     | 1     | 1     | 1     | 1     | 2      | 1       |
| 20     | 125 | 149 | 2144 | 50  | -15 | 1.1  | 1     | 1     | 1     | 1     | 2     | 1     | 1     | 1     | 2     | 1      | 2       |
| 21     | 125 | 343 | 3871 | 100 | -12 | 1.5  | 1     | 1     | 1     | 1     | 1     | 2     | 1     | 2     | 1     | 1      | 1       |
| 22     | 125 | 343 | 2890 | 100 | -9  | 1.42 | 2     | 1     | 2     | 1     | 1     | 1     | 2     | 1     | 1     | 1      | 2       |
| 23     | 125 | 967 | 3813 | 200 | -9  | 1.6  | 1     | 2     | 1     | 2     | 1     | 1     | 1     | 1     | 1     | 2      | 1       |
| 24     | 125 | 967 | 2671 | 200 | -8  | 1.65 | 1     | 1     | 1     | 1     | 2     | 1     | 1     | 1     | 2     | 1      | 2       |
| 25     | 50  | 55  | 158  | 25  | -55 | 1.1  | 1     | 1     | 1     | 1     | 1     | 2     | 1     | 2     | 1     | 1      | 1       |
| 26     | 60  | 68  | 208  | 25  | -45 | 1.03 | 1     | 1     | 2     | 1     | 1     | 1     | 2     | 1     | 1     | 1      | 2       |
| 27     | 70  | 71  | 198  | 25  | -50 | 1.08 | 2     | 1     | 1     | 1     | 1     | 1     | 1     | 1     | 1     | 2      | 1       |
| 28     | 50  | 56  | 258  | 50  | -50 | 1    | 1     | 2     | 1     | 1     | 1     | 1     | 1     | 1     | 2     | 1      | 2       |
| 29     | 60  | 78  | 386  | 50  | -50 | 0.92 | 1     | 1     | 1     | 1     | 1     | 1     | 1     | 2     | 1     | 1      | 1       |
| 30     | 70  | 95  | 279  | 50  | -50 | 0.99 | 1     | 1     | 1     | 1     | 1     | 1     | 2     | 1     | 1     | 1      | 2       |
| 31     | 50  | 168 | 314  | 100 | -25 | 1.12 | 1     | 1     | 1     | 1     | 1     | 1     | 1     | 1     | 1     | 2      | 1       |
| 32     | 60  | 151 | 385  | 100 | -30 | 1.25 | 2     | 1     | 1     | 1     | 1     | 1     | 1     | 1     | 2     | 1      | 2       |
| 33     | 70  | 172 | 354  | 100 | -29 | 1.19 | 1     | 2     | 1     | 1     | 1     | 1     | 1     | 2     | 1     | 1      | 1       |

Table S3 TiO<sub>2</sub> dataset: values of the descriptors, response and splitting

| ID Tot | X0  | X1  | X2   | X4  | X5  | LDH  | Rand1 | Rand2 | Rand3 | Rand4 | Rand5 | Rand6 | Rand7 | Rand8 | Rand9 | Rand10 |
|--------|-----|-----|------|-----|-----|------|-------|-------|-------|-------|-------|-------|-------|-------|-------|--------|
| 1      | 30  | 125 | 1250 | 25  | -10 | 0.9  | 1     | 2     | 1     | 1     | 1     | 1     | 1     | 1     | 2     | 1      |
| 2      | 30  | 102 | 987  | 25  | -12 | 1    | 1     | 1     | 2     | 1     | 1     | 1     | 1     | 1     | 1     | 1      |
| 3      | 30  | 281 | 1543 | 50  | -15 | 0.75 | 1     | 1     | 1     | 2     | 1     | 1     | 1     | 1     | 1     | 1      |
| 4      | 30  | 101 | 1045 | 50  | -9  | 0.7  | 1     | 1     | 1     | 1     | 2     | 1     | 1     | 1     | 1     | 2      |
| 5      | 30  | 299 | 1754 | 100 | -11 | 1.04 | 2     | 1     | 1     | 1     | 1     | 2     | 1     | 1     | 1     | 1      |
| 6      | 30  | 134 | 961  | 100 | -11 | 1.09 | 1     | 2     | 1     | 1     | 1     | 1     | 2     | 1     | 1     | 1      |
| 7      | 30  | 600 | 1876 | 200 | -12 | 1.15 | 1     | 1     | 2     | 1     | 1     | 1     | 1     | 2     | 2     | 1      |
| 8      | 30  | 298 | 1165 | 200 | -12 | 1.2  | 1     | 1     | 1     | 2     | 1     | 1     | 1     | 1     | 1     | 1      |
| 9      | 45  | 129 | 2567 | 25  | -9  | 0.9  | 1     | 1     | 1     | 1     | 2     | 1     | 1     | 1     | 1     | 1      |
| 10     | 45  | 129 | 2309 | 25  | -10 | 0.85 | 2     | 1     | 1     | 1     | 1     | 2     | 1     | 1     | 1     | 2      |
| 11     | 45  | 201 | 2431 | 50  | -9  | 0.75 | 1     | 2     | 1     | 1     | 1     | 1     | 2     | 1     | 1     | 1      |
| 12     | 45  | 201 | 2987 | 50  | -11 | 0.78 | 1     | 1     | 2     | 1     | 1     | 1     | 1     | 2     | 1     | 1      |
| 15     | 45  | 876 | 1965 | 200 | -11 | 1.35 | 1     | 1     | 1     | 2     | 1     | 1     | 1     | 1     | 2     | 1      |
| 16     | 45  | 876 | 2109 | 200 | -10 | 1.4  | 1     | 1     | 1     | 1     | 2     | 1     | 1     | 1     | 1     | 1      |
| 17     | 125 | 136 | 3215 | 25  | -11 | 1.25 | 2     | 1     | 1     | 1     | 1     | 2     | 1     | 1     | 1     | 1      |
| 18     | 125 | 136 | 2667 | 25  | -10 | 1.17 | 1     | 2     | 1     | 1     | 1     | 1     | 2     | 1     | 1     | 2      |
| 19     | 125 | 149 | 3782 | 50  | -10 | 1    | 1     | 1     | 2     | 1     | 1     | 1     | 1     | 2     | 1     | 1      |
| 20     | 125 | 149 | 2144 | 50  | -15 | 1.1  | 1     | 1     | 1     | 2     | 1     | 1     | 1     | 1     | 1     | 1      |
| 21     | 125 | 343 | 3871 | 100 | -12 | 1.5  | 1     | 1     | 1     | 1     | 2     | 1     | 1     | 1     | 2     | 1      |
| 22     | 125 | 343 | 2890 | 100 | -9  | 1.42 | 2     | 1     | 1     | 1     | 1     | 2     | 1     | 1     | 1     | 1      |
| 23     | 125 | 967 | 3813 | 200 | -9  | 1.6  | 1     | 1     | 1     | 1     | 1     | 1     | 2     | 1     | 1     | 1      |
| 24     | 125 | 967 | 2671 | 200 | -8  | 1.65 | 1     | 1     | 1     | 1     | 1     | 1     | 1     | 2     | 1     | 2      |

Table S4 ZnO dataset: values of the descriptors, response and splitting

| ID Tot | X0   | X1   | X2   | X4  | X5  | LDH  | Rand1 | Rand2 | Rand3 | Rand4 | Rand5 | Rand6 | Rand7 | Rand8 | Rand9 | Rand10 |
|--------|------|------|------|-----|-----|------|-------|-------|-------|-------|-------|-------|-------|-------|-------|--------|
| 25     | 50   | 55   | 158  | 25  | -55 | 1.1  | 1     | 2     | 1     | 1     | 1     | 1     | 2     | 1     | 1     | 1      |
| 26     | 60   | 68   | 208  | 25  | -45 | 1.03 | 1     | 1     | 2     | 1     | 1     | 1     | 1     | 2     | 1     | 1      |
| 27     | 70   | 71   | 198  | 25  | -50 | 1.08 | 1     | 1     | 1     | 2     | 1     | 1     | 1     | 1     | 1     | 1      |
| 28     | 50   | 56   | 258  | 50  | -50 | 1    | 1     | 1     | 1     | 1     | 2     | 2     | 1     | 1     | 1     | 1      |
| 29     | 60   | 78   | 386  | 50  | -50 | 0.92 | 2     | 1     | 1     | 1     | 1     | 1     | 2     | 1     | 1     | 1      |
| 30     | 70   | 95   | 279  | 50  | -50 | 0.99 | 1     | 2     | 1     | 1     | 1     | 1     | 1     | 2     | 1     | 2      |
| 31     | 50   | 168  | 314  | 100 | -25 | 1.12 | 1     | 1     | 2     | 1     | 1     | 1     | 1     | 1     | 2     | 1      |
| 32     | 60   | 151  | 385  | 100 | -30 | 1.25 | 1     | 1     | 1     | 2     | 1     | 2     | 1     | 1     | 1     | 1      |
| 33     | 70   | 172  | 354  | 100 | -29 | 1.19 | 1     | 1     | 1     | 1     | 2     | 1     | 2     | 1     | 1     | 1      |
| 34     | 1000 | 1245 | 1319 | 25  | -44 | 1.58 | 2     | 1     | 1     | 1     | 1     | 1     | 1     | 2     | 1     | 2      |
| 35     | 1200 | 1268 | 1325 | 25  | -33 | 1.69 | 1     | 2     | 1     | 1     | 1     | 1     | 1     | 1     | 2     | 1      |
| 36     | 1500 | 1198 | 1381 | 25  | -25 | 1.59 | 1     | 1     | 2     | 1     | 1     | 2     | 1     | 1     | 1     | 1      |
| 40     | 1000 | 1243 | 1925 | 100 | -20 | 1.25 | 1     | 1     | 1     | 2     | 1     | 1     | 1     | 1     | 1     | 1      |
| 41     | 1200 | 1124 | 1805 | 100 | -21 | 1.39 | 1     | 1     | 1     | 1     | 2     | 1     | 1     | 1     | 1     | 2      |
| 42     | 1500 | 1269 | 2109 | 100 | -21 | 1.45 | 2     | 1     | 1     | 1     | 1     | 1     | 1     | 1     | 2     | 1      |

Table S5. Results calculated for MLR models for the TiO<sub>2</sub> dataset.

| Model | n training | R <sup>2</sup> | Q <sup>2</sup> loo | RMSE tr | CCC tr* | s    | F     | RMSE cv | CCC cv* | Q <sup>2</sup> LMO | R <sup>2</sup> Yscr | RMSE ext | R <sup>2</sup> ext | Q <sup>2</sup> ext F1* | Q <sup>2</sup> ext F2* | Q <sup>2</sup> ext F3* | CCC ext* |
|-------|------------|----------------|--------------------|---------|---------|------|-------|---------|---------|--------------------|---------------------|----------|--------------------|------------------------|------------------------|------------------------|----------|
| R1    | 18         | 0.83           | 0.77               | 0.12    | 0.91    | 0.13 | 37.02 | 0.14    | 0.87    | 0.75               | 0.12                | 0.09     | 0.98               | 0.83                   | 0.83                   | 0.90                   | 0.91     |
| R2    | 18         | 0.85           | 0.78               | 0.11    | 0.92    | 0.12 | 41.94 | 0.13    | 0.88    | 0.77               | 0.12                | 0.11     | 0.55               | 0.76                   | 0.51                   | 0.84                   | 0.72     |
| R3    | 18         | 0.91           | 0.87               | 0.09    | 0.95    | 0.10 | 71.55 | 0.11    | 0.93    | 0.86               | 0.12                | 0.19     | 0.32               | 0.20                   | -1.02                  | 0.58                   | 0.48     |
| R4    | 18         | 0.84           | 0.77               | 0.12    | 0.91    | 0.13 | 38.11 | 0.14    | 0.88    | 0.76               | 0.12                | 0.09     | 0.94               | 0.82                   | 0.82                   | 0.89                   | 0.90     |
| R5    | 18         | 0.83           | 0.76               | 0.11    | 0.91    | 0.12 | 35.72 | 0.13    | 0.87    | 0.74               | 0.12                | 0.13     | 0.94               | 0.85                   | 0.85                   | 0.75                   | 0.90     |
| R6    | 18         | 0.83           | 0.77               | 0.12    | 0.91    | 0.13 | 37.02 | 0.14    | 0.87    | 0.75               | 0.12                | 0.09     | 0.98               | 0.83                   | 0.83                   | 0.90                   | 0.91     |
| R7    | 18         | 0.82           | 0.74               | 0.11    | 0.90    | 0.13 | 33.61 | 0.14    | 0.86    | 0.72               | 0.12                | 0.10     | 0.90               | 0.90                   | 0.90                   | 0.87                   | 0.94     |
| R8    | 18         | 0.85           | 0.80               | 0.10    | 0.92    | 0.11 | 42.61 | 0.12    | 0.89    | 0.79               | 0.11                | 0.16     | 0.95               | 0.76                   | 0.76                   | 0.65                   | 0.87     |
| R9    | 18         | 0.85           | 0.80               | 0.10    | 0.92    | 0.11 | 42.61 | 0.12    | 0.89    | 0.79               | 0.11                | 0.16     | 0.95               | 0.76                   | 0.76                   | 0.65                   | 0.87     |
| R10   | 18         | 0.85           | 0.80               | 0.10    | 0.92    | 0.11 | 42.61 | 0.12    | 0.89    | 0.79               | 0.11                | 0.16     | 0.95               | 0.76                   | 0.76                   | 0.65                   | 0.87     |
| Full  | 22         | 0.84           | 0.79               | 0.11    | 0.91    | 0.12 | 48.44 | 0.13    | 0.88    | 0.78               | 0.10                | N.A.     | N.A.               | N.A.                   | N.A.                   | N.A.                   | N.A.     |

\* Detailed explanation of these statistical parameters in N. Chirico, and P. Gramatica, J. Chem. Inf. Model. 51 (2011), 2320–2335

Table S6. Results calculated for MLR models for the ZnO dataset.

| Model | n training | R <sup>2</sup> | Q <sup>2</sup> loo | RMSE tr | CCC tr* | s    | F     | RMSE cv | CCC cv* | Q <sup>2</sup> LMO | R <sup>2</sup> Yscr | RMSE ext | R <sup>2</sup> ext | Q <sup>2</sup> ext F1* | Q <sup>2</sup> ext F2* | Q <sup>2</sup> ext F3* | CCC ext* |
|-------|------------|----------------|--------------------|---------|---------|------|-------|---------|---------|--------------------|---------------------|----------|--------------------|------------------------|------------------------|------------------------|----------|
| R1    | 12         | 0.91           | 0.77               | 0.06    | 0.95    | 0.08 | 28.05 | 0.11    | 0.88    | 0.56               | 0.27                | 0.13     | 0.82               | 0.82                   | 0.80                   | 0.66                   | 0.90     |
| R2    | 12         | 0.88           | 0.72               | 0.08    | 0.93    | 0.09 | 18.87 | 0.11    | 0.85    | 0.58               | 0.27                | 0.06     | 0.97               | 0.96                   | 0.96                   | 0.91                   | 0.98     |
| R3    | 12         | 0.89           | 0.74               | 0.08    | 0.94    | 0.09 | 22.53 | 0.12    | 0.87    | 0.56               | 0.27                | 0.07     | 0.94               | 0.92                   | 0.92                   | 0.91                   | 0.95     |
| R4    | 12         | 0.97           | 0.94               | 0.04    | 0.99    | 0.05 | 94.71 | 0.07    | 0.97    | 0.00               | 0.16                | -1.44    | 0.45               | 0.00                   | 0.63                   | 1.01                   | 0.98     |
| R5    | 12         | 0.90           | 0.67               | 0.08    | 0.95    | 0.10 | 23.99 | 0.14    | 0.83    | 0.57               | 0.28                | 0.04     | 0.99               | 0.95                   | 0.95                   | 0.98                   | 0.97     |
| R6    | 12         | 0.91           | 0.79               | 0.07    | 0.95    | 0.08 | 27.92 | 0.11    | 0.89    | 0.56               | 0.27                | 0.10     | 0.90               | 0.85                   | 0.85                   | 0.83                   | 0.92     |
| R7    | 12         | 0.90           | 0.75               | 0.08    | 0.95    | 0.09 | 23.36 | 0.12    | 0.87    | 0.56               | 0.28                | 0.05     | 0.88               | 0.95                   | 0.77                   | 0.95                   | 0.84     |
| R8    | 12         | 0.89           | 0.75               | 0.08    | 0.94    | 0.09 | 21.18 | 0.11    | 0.87    | 0.65               | 0.27                | 0.07     | 0.99               | 0.94                   | 0.94                   | 0.91                   | 0.97     |
| R9    | 12         | 0.92           | 0.75               | 0.06    | 0.96    | 0.08 | 29.54 | 0.11    | 0.88    | 0.67               | 0.28                | 0.15     | 0.64               | 0.80                   | 0.61                   | 0.54                   | 0.78     |
| R10   | 12         | 0.89           | 0.66               | 0.07    | 0.94    | 0.09 | 22.34 | 0.13    | 0.82    | 0.61               | 0.27                | 0.07     | 0.95               | 0.93                   | 0.92                   | 0.91                   | 0.96     |
| Full  | 15         | 0.91           | 0.80               | 0.07    | 0.95    | 0.08 | 35.46 | 0.10    | 0.90    | 0.76               | 0.22                | N.A.     | N.A.               | N.A.                   | N.A.                   | N.A.                   | N.A.     |

\* Detailed explanation of these statistical parameters in N. Chirico, and P. Gramatica, J. Chem. Inf. Model. 51 (2011), 2320–2335



Table S7 Comparison of performances of MLR and non-linear models developed for the complete dataset (ZnO and TiO<sub>2</sub> NPs, 31 NPs in total). Modelling variables: X0, X2, X4. Ten random splitting 20% (R1-10) and one 50% (R11).

| <b>MLR</b>            |                              |                     |                              |                      |                              |                     |                                              |
|-----------------------|------------------------------|---------------------|------------------------------|----------------------|------------------------------|---------------------|----------------------------------------------|
| <b>Split</b>          | <b>R<sup>2</sup><br/>tr.</b> | <b>RMSE<br/>tr.</b> | <b>R<sup>2</sup><br/>ext</b> | <b>RMSE<br/>Pred</b> | <b>Q<sup>2</sup><br/>Loo</b> | <b>RMSE<br/>Loo</b> | <b>Delta<br/>R<sup>2</sup>-Q<sup>2</sup></b> |
| R1                    | 0.81                         | 0.11                | 0.98                         | 0.08                 | 0.73                         | 0.13                | 0.08                                         |
| R2                    | 0.78                         | 0.11                | 0.92                         | 0.08                 | 0.69                         | 0.13                | 0.09                                         |
| R3                    | 0.81                         | 0.10                | 0.88                         | 0.11                 | 0.72                         | 0.12                | 0.09                                         |
| R4                    | 0.81                         | 0.10                | 0.85                         | 0.12                 | 0.74                         | 0.12                | 0.07                                         |
| R5                    | 0.82                         | 0.10                | 0.83                         | 0.14                 | 0.75                         | 0.11                | 0.07                                         |
| R6                    | 0.85                         | 0.09                | 0.65                         | 0.17                 | 0.80                         | 0.10                | 0.06                                         |
| R7                    | 0.81                         | 0.11                | 0.89                         | 0.08                 | 0.73                         | 0.13                | 0.08                                         |
| R8                    | 0.85                         | 0.09                | 0.70                         | 0.15                 | 0.79                         | 0.11                | 0.06                                         |
| R9                    | 0.78                         | 0.11                | 0.86                         | 0.10                 | 0.70                         | 0.12                | 0.08                                         |
| R10                   | 0.81                         | 0.10                | 0.83                         | 0.10                 | 0.73                         | 0.12                | 0.07                                         |
| R11                   | 0.80                         | 0.11                | 0.83                         | 0.10                 | 0.64                         | 0.14                | 0.15                                         |
| <b>SVM<br/>Linear</b> |                              |                     |                              |                      |                              |                     |                                              |
| <b>Split</b>          | <b>R<sup>2</sup><br/>tr.</b> | <b>RMSE<br/>tr.</b> | <b>R<sup>2</sup><br/>ext</b> | <b>RMSE<br/>Pred</b> | <b>Q<sup>2</sup><br/>Loo</b> | <b>RMSE<br/>Loo</b> | <b>Delta<br/>R<sup>2</sup>-Q<sup>2</sup></b> |
| R1                    | 0.80                         | 0.11                | 0.96                         | 0.08                 | 0.62                         | 0.15                | 0.18                                         |
| R2                    | 0.77                         | 0.11                | 0.89                         | 0.09                 | 0.73                         | 0.12                | 0.04                                         |
| R3                    | 0.80                         | 0.11                | 0.87                         | 0.13                 | 0.71                         | 0.13                | 0.09                                         |
| R4                    | 0.80                         | 0.10                | 0.83                         | 0.13                 | 0.71                         | 0.13                | 0.10                                         |
| R5                    | 0.81                         | 0.11                | 0.81                         | 0.12                 | 0.72                         | 0.12                | 0.09                                         |
| R6                    | 0.85                         | 0.09                | 0.65                         | 0.17                 | 0.81                         | 0.10                | 0.04                                         |
| R7                    | 0.80                         | 0.12                | 0.89                         | 0.10                 | 0.72                         | 0.13                | 0.08                                         |
| R8                    | 0.85                         | 0.10                | 0.75                         | 0.14                 | 0.82                         | 0.11                | 0.04                                         |
| R9                    | 0.77                         | 0.11                | 0.83                         | 0.11                 | 0.69                         | 0.13                | 0.08                                         |
| R10                   | 0.80                         | 0.11                | 0.79                         | 0.11                 | 0.73                         | 0.13                | 0.08                                         |
| R11                   | 0.78                         | 0.11                | 0.81                         | 0.11                 | 0.69                         | 0.13                | 0.10                                         |
| <b>SVM<br/>Radial</b> |                              |                     |                              |                      |                              |                     |                                              |
| <b>Split</b>          | <b>R<sup>2</sup><br/>tr.</b> | <b>RMSE<br/>tr.</b> | <b>R<sup>2</sup><br/>ext</b> | <b>RMSE<br/>Pred</b> | <b>Q<sup>2</sup><br/>Loo</b> | <b>RMSE<br/>Loo</b> | <b>Delta<br/>R<sup>2</sup>-Q<sup>2</sup></b> |
| R1                    | 0.99                         | 0.03                | 0.86                         | 0.10                 | 0.65                         | 0.15                | 0.34                                         |
| R2                    | 0.84                         | 0.10                | 0.99                         | 0.07                 | 0.39                         | 0.18                | 0.45                                         |
| R3                    | 0.93                         | 0.06                | 0.98                         | 0.11                 | 0.54                         | 0.16                | 0.39                                         |
| R4                    | 0.96                         | 0.05                | 0.71                         | 0.15                 | 0.80                         | 0.11                | 0.16                                         |
| R5                    | 0.93                         | 0.06                | 0.94                         | 0.08                 | 0.61                         | 0.14                | 0.32                                         |
| R6                    | 0.96                         | 0.05                | 0.72                         | 0.15                 | 0.69                         | 0.13                | 0.27                                         |
| R7                    | 0.96                         | 0.05                | 0.94                         | 0.07                 | 0.55                         | 0.17                | 0.41                                         |
| R8                    | 0.99                         | 0.03                | 0.72                         | 0.14                 | 0.56                         | 0.16                | 0.43                                         |
| R9                    | 0.96                         | 0.05                | 0.89                         | 0.14                 | 0.49                         | 0.16                | 0.47                                         |
| R10                   | 0.99                         | 0.03                | 0.50                         | 0.17                 | 0.69                         | 0.14                | 0.30                                         |
| R11                   | 0.88                         | 0.09                | 0.83                         | 0.12                 | 0.18                         | 0.23                | 0.71                                         |
| <b>RBF<br/>NN</b>     |                              |                     |                              |                      |                              |                     |                                              |
| <b>Split</b>          | <b>R<sup>2</sup><br/>tr.</b> | <b>RMSE<br/>tr.</b> | <b>R<sup>2</sup><br/>ext</b> | <b>RMSE<br/>Pred</b> | <b>Q<sup>2</sup><br/>Loo</b> | <b>RMSE<br/>Loo</b> | <b>Delta<br/>R<sup>2</sup>-Q<sup>2</sup></b> |
| R1                    | 0.83                         | 0.10                | 0.91                         | 0.12                 | 0.71                         | 0.13                | 0.12                                         |
| R2                    | 0.78                         | 0.11                | 0.91                         | 0.08                 | 0.69                         | 0.14                | 0.09                                         |
| R3                    | 0.81                         | 0.10                | 0.88                         | 0.11                 | 0.70                         | 0.13                | 0.11                                         |
| R4                    | 0.80                         | 0.10                | 0.86                         | 0.11                 | 0.70                         | 0.14                | 0.11                                         |
| R5                    | 0.82                         | 0.10                | 0.84                         | 0.14                 | 0.75                         | 0.12                | 0.07                                         |
| R6                    | 0.88                         | 0.08                | 0.47                         | 0.19                 | 0.81                         | 0.10                | 0.07                                         |
| R7                    | 0.81                         | 0.11                | 0.90                         | 0.07                 | 0.74                         | 0.13                | 0.07                                         |
| R8                    | 0.88                         | 0.08                | 0.36                         | 0.20                 | 0.84                         | 0.11                | 0.04                                         |
| R9                    | 0.79                         | 0.10                | 0.90                         | 0.08                 | 0.68                         | 0.13                | 0.11                                         |
| R10                   | 0.79                         | 0.11                | 0.82                         | 0.11                 | 0.72                         | 0.14                | 0.07                                         |
| R11                   | 0.79                         | 0.11                | 0.81                         | 0.11                 | 0.66                         | 0.14                | 0.13                                         |
| <b>GReg<br/>NN</b>    |                              |                     |                              |                      |                              |                     |                                              |
| <b>Split</b>          | <b>R<sup>2</sup><br/>tr.</b> | <b>RMSE<br/>tr.</b> | <b>R<sup>2</sup><br/>ext</b> | <b>RMSE<br/>Pred</b> | <b>Q<sup>2</sup><br/>Loo</b> | <b>RMSE<br/>Loo</b> | <b>Delta<br/>R<sup>2</sup>-Q<sup>2</sup></b> |
| R1                    | 0.83                         | 0.10                | 0.90                         | 0.13                 | 0.68                         | 0.14                | 0.15                                         |
| R2                    | 0.84                         | 0.09                | 0.94                         | 0.07                 | 0.57                         | 0.15                | 0.28                                         |
| R3                    | 0.82                         | 0.10                | 0.86                         | 0.13                 | 0.65                         | 0.14                | 0.18                                         |
| R4                    | 0.95                         | 0.05                | 0.79                         | 0.14                 | 0.76                         | 0.12                | 0.18                                         |
| R5                    | 0.92                         | 0.07                | 0.89                         | 0.11                 | 0.66                         | 0.14                | 0.26                                         |
| R6                    | 0.86                         | 0.09                | 0.67                         | 0.17                 | 0.71                         | 0.12                | 0.15                                         |
| R7                    | 0.81                         | 0.11                | 0.92                         | 0.07                 | 0.64                         | 0.15                | 0.17                                         |
| R8                    | 0.85                         | 0.09                | 0.90                         | 0.15                 | 0.70                         | 0.13                | 0.15                                         |
| R9                    | 0.99                         | 0.02                | 0.94                         | 0.07                 | 0.76                         | 0.11                | 0.24                                         |
| R10                   | 0.85                         | 0.10                | 0.70                         | 0.14                 | 0.71                         | 0.13                | 0.14                                         |
| R11                   | 0.79                         | 0.11                | 0.83                         | 0.11                 | 0.44                         | 0.17                | 0.35                                         |

Table S8. Comparison of performances of MLR and non-linear models developed for 22 TiO<sub>2</sub> NPs. Modelling variables: X0, X4. Ten random splitting 20% (R1-10).

| MLR   |                       |             |                       |              |                       |             |                                         |
|-------|-----------------------|-------------|-----------------------|--------------|-----------------------|-------------|-----------------------------------------|
| Split | R <sup>2</sup><br>tr. | RMS<br>Etr. | R <sup>2</sup><br>ext | RMSE<br>Pred | Q <sup>2</sup><br>Loo | RMSE<br>Loo | Delta<br>R <sup>2</sup> -Q <sup>2</sup> |
| R1    | 0.83                  | 0.12        | 0.98                  | 0.09         | 0.77                  | 0.14        | 0.07                                    |
| R2    | 0.85                  | 0.11        | 0.55                  | 0.11         | 0.78                  | 0.13        | 0.06                                    |
| R3    | 0.91                  | 0.09        | 0.32                  | 0.19         | 0.87                  | 0.11        | 0.04                                    |
| R4    | 0.84                  | 0.12        | 0.94                  | 0.09         | 0.77                  | 0.14        | 0.06                                    |
| R5    | 0.83                  | 0.11        | 0.94                  | 0.13         | 0.76                  | 0.13        | 0.07                                    |
| R6    | 0.83                  | 0.12        | 0.98                  | 0.09         | 0.77                  | 0.14        | 0.07                                    |
| R7    | 0.82                  | 0.11        | 0.90                  | 0.10         | 0.74                  | 0.14        | 0.08                                    |
| R8    | 0.85                  | 0.10        | 0.95                  | 0.16         | 0.80                  | 0.12        | 0.05                                    |
| R9    | 0.84                  | 0.11        | 0.77                  | 0.12         | 0.79                  | 0.13        | 0.06                                    |
| R10   | 0.78                  | 0.12        | 0.97                  | 0.09         | 0.69                  | 0.14        | 0.09                                    |

  

| SVM<br>Linear |                       |             |                       |              |                       |             |                                         | SVM<br>Radial         |             |                       |              |                       |             |                                         |
|---------------|-----------------------|-------------|-----------------------|--------------|-----------------------|-------------|-----------------------------------------|-----------------------|-------------|-----------------------|--------------|-----------------------|-------------|-----------------------------------------|
| Split         | R <sup>2</sup><br>tr. | RMS<br>Etr. | R <sup>2</sup><br>ext | RMSE<br>Pred | Q <sup>2</sup><br>Loo | RMSE<br>Loo | Delta<br>R <sup>2</sup> -Q <sup>2</sup> | R <sup>2</sup><br>tr. | RMSE<br>tr. | R <sup>2</sup><br>ext | RMSE<br>Pred | Q <sup>2</sup><br>Loo | RMSE<br>Loo | Delta<br>R <sup>2</sup> -Q <sup>2</sup> |
| R1            | 0.83                  | 0.12        | 0.99                  | 0.08         | 0.66                  | 0.17        | 0.17                                    | 0.99                  | 0.04        | 0.89                  | 0.07         | 0.85                  | 0.11        | 0.13                                    |
| R2            | 0.84                  | 0.12        | 0.53                  | 0.12         | 0.79                  | 0.13        | 0.05                                    | 0.98                  | 0.04        | 0.89                  | 0.06         | 0.73                  | 0.16        | 0.25                                    |
| R3            | 0.90                  | 0.09        | 0.30                  | 0.19         | 0.89                  | 0.10        | 0.02                                    | 0.99                  | 0.03        | 0.77                  | 0.10         | 0.92                  | 0.08        | 0.07                                    |
| R4            | 0.84                  | 0.12        | 0.91                  | 0.11         | 0.78                  | 0.14        | 0.05                                    | 0.95                  | 0.07        | 0.99                  | 0.06         | 0.81                  | 0.13        | 0.14                                    |
| R5            | 0.82                  | 0.11        | 0.96                  | 0.12         | 0.74                  | 0.14        | 0.08                                    | 0.97                  | 0.05        | 0.98                  | 0.09         | 0.83                  | 0.11        | 0.14                                    |
| R6            | 0.83                  | 0.12        | 0.99                  | 0.08         | 0.66                  | 0.17        | 0.17                                    | 0.99                  | 0.04        | 0.89                  | 0.07         | 0.85                  | 0.11        | 0.13                                    |
| R7            | 0.81                  | 0.12        | 0.89                  | 0.11         | 0.78                  | 0.13        | 0.03                                    | 0.98                  | 0.04        | 0.98                  | 0.05         | 0.76                  | 0.13        | 0.22                                    |
| R8            | 0.85                  | 0.10        | 0.95                  | 0.16         | 0.79                  | 0.12        | 0.06                                    | 0.98                  | 0.04        | 0.94                  | 0.09         | 0.78                  | 0.12        | 0.20                                    |
| R9            | 0.84                  | 0.11        | 0.77                  | 0.11         | 0.77                  | 0.14        | 0.07                                    | 0.99                  | 0.03        | 0.94                  | 0.08         | 0.82                  | 0.12        | 0.17                                    |
| R10           | 0.78                  | 0.13        | 0.98                  | 0.12         | 0.69                  | 0.14        | 0.09                                    | 0.98                  | 0.04        | 1.00                  | 0.07         | 0.85                  | 0.10        | 0.13                                    |

  

| RBF<br>NN |                       |             |                       |              |                       |             |                                         | GReg<br>NN            |             |                       |              |                       |             |                                         |
|-----------|-----------------------|-------------|-----------------------|--------------|-----------------------|-------------|-----------------------------------------|-----------------------|-------------|-----------------------|--------------|-----------------------|-------------|-----------------------------------------|
| Split     | R <sup>2</sup><br>tr. | RMS<br>Etr. | R <sup>2</sup><br>ext | RMSE<br>Pred | Q <sup>2</sup><br>Loo | RMSE<br>Loo | Delta<br>R <sup>2</sup> -Q <sup>2</sup> | R <sup>2</sup><br>tr. | RMSE<br>tr. | R <sup>2</sup><br>ext | RMSE<br>Pred | Q <sup>2</sup><br>Loo | RMSE<br>Loo | Delta<br>R <sup>2</sup> -Q <sup>2</sup> |
| R1        | 0.79                  | 0.13        | 0.93                  | 0.07         | 0.85                  | 0.12        | -0.06                                   | 0.85                  | 0.06        | 0.98                  | 0.12         | 0.74                  | 0.15        | 0.11                                    |
| R2        | 0.85                  | 0.12        | 0.38                  | 0.12         | 0.85                  | 0.12        | 0.01                                    | 0.85                  | 0.11        | 0.63                  | 0.10         | 0.75                  | 0.14        | 0.11                                    |
| R3        | 0.88                  | 0.10        | 0.11                  | 0.18         | 0.92                  | 0.09        | -0.03                                   | 0.90                  | 0.09        | 0.50                  | 0.17         | 0.83                  | 0.12        | 0.08                                    |
| R4        | 0.81                  | 0.15        | 0.80                  | 0.13         | 0.86                  | 0.13        | -0.05                                   | 0.85                  | 0.11        | 0.86                  | 0.11         | 0.73                  | 0.15        | 0.12                                    |
| R5        | 0.78                  | 0.12        | 0.94                  | 0.13         | 0.77                  | 0.13        | 0.01                                    | 0.86                  | 0.10        | 0.94                  | 0.18         | 0.75                  | 0.13        | 0.10                                    |
| R6        | 0.79                  | 0.13        | 0.93                  | 0.07         | 0.85                  | 0.11        | -0.06                                   | 0.85                  | 0.11        | 0.97                  | 0.12         | 0.74                  | 0.15        | 0.11                                    |
| R7        | 0.96                  | 0.06        | 0.98                  | 0.05         | 0.93                  | 0.07        | 0.03                                    | 0.83                  | 0.11        | 0.89                  | 0.14         | 0.68                  | 0.15        | 0.15                                    |
| R8        | 0.85                  | 0.10        | 0.95                  | 0.16         | 0.81                  | 0.12        | 0.04                                    | 0.86                  | 0.10        | 0.88                  | 0.18         | 0.75                  | 0.13        | 0.11                                    |
| R9        | 0.84                  | 0.11        | 0.86                  | 0.11         | 0.93                  | 0.09        | -0.09                                   | 0.85                  | 0.11        | 0.70                  | 0.15         | 0.74                  | 0.14        | 0.11                                    |
| R10       | 0.78                  | 0.12        | 0.98                  | 0.09         | 0.73                  | 0.13        | 0.05                                    | 0.80                  | 0.11        | 0.97                  | 0.15         | 0.64                  | 0.15        | 0.16                                    |

Table S9. Comparison of performances of MLR and non-linear models developed for 15 ZnO NPs. Modelling variables: X1, X2, X4. Ten random splitting 20% (R1-10).

| MLR           |                       |             |                       |              |                       |             |                                         |                       |             |                       |              |                       |             |                                         |
|---------------|-----------------------|-------------|-----------------------|--------------|-----------------------|-------------|-----------------------------------------|-----------------------|-------------|-----------------------|--------------|-----------------------|-------------|-----------------------------------------|
| Split         | R <sup>2</sup><br>tr. | RMSE<br>tr. | R <sup>2</sup><br>ext | RMSE<br>Pred | Q <sup>2</sup><br>Loo | RMSE<br>Loo | Delta<br>R <sup>2</sup> -Q <sup>2</sup> |                       |             |                       |              |                       |             |                                         |
| R1            | 0.91                  | 0.06        | 0.82                  | 0.13         | 0.77                  | 0.11        | 0.15                                    |                       |             |                       |              |                       |             |                                         |
| R2            | 0.88                  | 0.08        | 0.97                  | 0.06         | 0.72                  | 0.11        | 0.16                                    |                       |             |                       |              |                       |             |                                         |
| R3            | 0.89                  | 0.08        | 0.94                  | 0.07         | 0.74                  | 0.12        | 0.15                                    |                       |             |                       |              |                       |             |                                         |
| R4            | 0.97                  | 0.04        | 0.41                  | 0.16         | 0.94                  | 0.07        | 0.04                                    |                       |             |                       |              |                       |             |                                         |
| R5            | 0.90                  | 0.08        | 0.99                  | 0.04         | 0.67                  | 0.14        | 0.23                                    |                       |             |                       |              |                       |             |                                         |
| R6            | 0.91                  | 0.07        | 0.90                  | 0.10         | 0.79                  | 0.11        | 0.12                                    |                       |             |                       |              |                       |             |                                         |
| R7            | 0.90                  | 0.08        | 0.88                  | 0.05         | 0.75                  | 0.12        | 0.15                                    |                       |             |                       |              |                       |             |                                         |
| R8            | 0.89                  | 0.08        | 0.99                  | 0.07         | 0.75                  | 0.11        | 0.14                                    |                       |             |                       |              |                       |             |                                         |
| R9            | 0.92                  | 0.06        | 0.64                  | 0.15         | 0.75                  | 0.11        | 0.17                                    |                       |             |                       |              |                       |             |                                         |
| R10           | 0.89                  | 0.07        | 0.95                  | 0.07         | 0.66                  | 0.13        | 0.24                                    |                       |             |                       |              |                       |             |                                         |
| SVM<br>Linear |                       |             |                       |              |                       |             |                                         | SVM<br>Radial         |             |                       |              |                       |             |                                         |
| Split         | R <sup>2</sup><br>tr. | RMSE<br>tr. | R <sup>2</sup><br>ext | RMSE<br>Pred | Q <sup>2</sup><br>Loo | RMSE<br>Loo | Delta<br>R <sup>2</sup> -Q <sup>2</sup> | R <sup>2</sup><br>tr. | RMSE<br>tr. | R <sup>2</sup><br>ext | RMSE<br>Pred | Q <sup>2</sup><br>Loo | RMSE<br>Loo | Delta<br>R <sup>2</sup> -Q <sup>2</sup> |
| R1            | 0.88                  | 0.08        | 0.93                  | 0.08         | 0.44                  | 0.17        | 0.44                                    | 0.99                  | 0.02        | 0.49                  | 0.22         | 0.88                  | 0.07        | 0.11                                    |
| R2            | 0.85                  | 0.08        | 0.97                  | 0.07         | 0.79                  | 0.10        | 0.07                                    | 0.99                  | 0.02        | 1.00                  | 0.08         | 0.84                  | 0.08        | 0.15                                    |
| R3            | 0.87                  | 0.09        | 0.99                  | 0.04         | 0.59                  | 0.18        | 0.28                                    | 0.96                  | 0.05        | 0.99                  | 0.07         | 0.71                  | 0.13        | 0.25                                    |
| R4            | 0.97                  | 0.05        | 0.33                  | 0.16         | 0.92                  | 0.08        | 0.05                                    | 0.99                  | 0.03        | 0.55                  | 0.10         | 0.94                  | 0.06        | 0.04                                    |
| R5            | 0.88                  | 0.09        | 0.93                  | 0.04         | 0.63                  | 0.17        | 0.26                                    | 0.99                  | 0.02        | 1.00                  | 0.10         | 0.78                  | 0.12        | 0.21                                    |
| R6            | 0.89                  | 0.08        | 0.86                  | 0.11         | 0.68                  | 0.15        | 0.21                                    | 1.00                  | 0.02        | 0.78                  | 0.24         | 0.78                  | 0.11        | 0.22                                    |
| R7            | 0.88                  | 0.09        | 0.99                  | 0.08         | 0.75                  | 0.13        | 0.12                                    | 0.94                  | 0.06        | 0.78                  | 0.07         | 0.86                  | 0.09        | 0.08                                    |
| R8            | 0.86                  | 0.09        | 1.00                  | 0.07         | 0.53                  | 0.16        | 0.33                                    | 0.99                  | 0.02        | 0.98                  | 0.06         | 0.76                  | 0.11        | 0.23                                    |
| R9            | 0.89                  | 0.07        | 0.50                  | 0.20         | 0.60                  | 0.16        | 0.29                                    | 0.99                  | 0.02        | 0.68                  | 0.16         | 0.90                  | 0.07        | 0.09                                    |
| R10           | 0.87                  | 0.09        | 0.99                  | 0.06         | 0.67                  | 0.14        | 0.19                                    | 1.00                  | 0.02        | 0.82                  | 0.10         | 0.29                  | 0.20        | 0.70                                    |
| RBF<br>NN     |                       |             |                       |              |                       |             |                                         | GReg<br>NN            |             |                       |              |                       |             |                                         |
| Split         | R <sup>2</sup><br>tr. | RMSE<br>tr. | R <sup>2</sup><br>ext | RMSE<br>Pred | Q <sup>2</sup><br>Loo | RMSE<br>Loo | Delta<br>R <sup>2</sup> -Q <sup>2</sup> | R <sup>2</sup><br>tr. | RMSE<br>tr. | R <sup>2</sup><br>ext | RMSE<br>Pred | Q <sup>2</sup><br>Loo | RMSE<br>Loo | Delta<br>R <sup>2</sup> -Q <sup>2</sup> |
| R1            | 0.99                  | 0.02        | 0.58                  | 0.20         | 0.88                  | 0.07        | 0.11                                    | 0.96                  | 0.04        | 0.87                  | 0.10         | 0.85                  | 0.08        | 0.11                                    |
| R2            | 0.86                  | 0.08        | 0.93                  | 0.08         | 0.76                  | 0.17        | 0.10                                    | 0.94                  | 0.05        | 1.00                  | 0.07         | 0.84                  | 0.08        | 0.10                                    |
| R3            | 0.88                  | 0.08        | 0.97                  | 0.10         | 0.66                  | 0.14        | 0.22                                    | 0.95                  | 0.05        | 0.99                  | 0.07         | 0.86                  | 0.09        | 0.10                                    |
| R4            | 0.98                  | 0.04        | 0.36                  | 0.13         | 0.96                  | 0.05        | 0.02                                    | 0.98                  | 0.04        | 0.52                  | 0.11         | 0.94                  | 0.06        | 0.04                                    |
| R5            | 0.89                  | 0.08        | 0.96                  | 0.04         | 0.70                  | 0.14        | 0.19                                    | 0.95                  | 0.05        | 0.98                  | 0.04         | 0.81                  | 0.11        | 0.14                                    |
| R6            | 0.91                  | 0.07        | 0.91                  | 0.09         | 0.77                  | 0.11        | 0.14                                    | 0.95                  | 0.05        | 0.97                  | 0.06         | 0.84                  | 0.09        | 0.10                                    |
| R7            | 0.90                  | 0.08        | 0.49                  | 0.11         | 0.69                  | 0.14        | 0.20                                    | 0.94                  | 0.06        | 0.60                  | 0.08         | 0.85                  | 0.09        | 0.09                                    |
| R8            | 0.88                  | 0.08        | 0.99                  | 0.08         | 0.70                  | 0.11        | 0.17                                    | 0.95                  | 0.05        | 1.00                  | 0.04         | 0.83                  | 0.09        | 0.12                                    |
| R9            | 0.92                  | 0.06        | 0.58                  | 0.18         | 0.73                  | 0.12        | 0.19                                    | 0.97                  | 0.03        | 0.83                  | 0.12         | 0.89                  | 0.07        | 0.08                                    |
| R10           | 0.88                  | 0.08        | 0.94                  | 0.07         | 0.69                  | 0.13        | 0.20                                    | 0.95                  | 0.05        | 0.97                  | 0.05         | 0.79                  | 0.11        | 0.15                                    |
